# Supplementary material for: Predictors of mortality for patients with COVID-19 pneumonia caused by SARS-CoV-2: a prospective cohort study
Source: PubMed Central journal article supplement — Eur Respir J. 2020 May 7;55(5):2000524. doi: 10.1183/13993003.00524-2020 (PMC7144257; doi:10.1183/13993003.00524-2020), 2020-05-07
Supplement: ERJ-00524-2020.Shareable.pdf [file ERJ-00524-2020.Shareable.pdf]

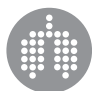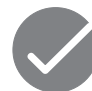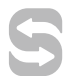

SHAREABLE PDF

# Predictors of mortality for patients with COVID-19 pneumonia caused by SARS-CoV-2: a prospective cohort study

Rong-Hui Du<sup>1,3</sup>, Li-Rong Liang<sup>2,3</sup>, Cheng-Qing Yang<sup>1,3</sup>, Wen Wang<sup>2,3</sup>,  
Tan-Ze Cao<sup>1</sup>, Ming Li<sup>1</sup>, Guang-Yun Guo<sup>1</sup>, Juan Du<sup>1</sup>, Chun-Lan Zheng<sup>1</sup>, Qi Zhu<sup>1</sup>,  
Ming Hu<sup>1</sup>, Xu-Yan Li<sup>2</sup>, Peng Peng<sup>1,4</sup> and Huan-Zhong Shi<sup>1,4</sup>

**Affiliations:** <sup>1</sup>Dept of Respiratory and Critical Care Medicine, Wuhan Pulmonary Hospital, Wuhan, China. <sup>2</sup>Dept of Respiratory and Critical Care Medicine, Beijing Chao-Yang Hospital, Capital Medical University, Beijing, China. <sup>3</sup>These authors contributed equally. <sup>4</sup>These authors are joint principal authors.

**Correspondence:** Huan-Zhong Shi, Dept of Respiratory and Critical Care Medicine, Beijing Chao-Yang Hospital, Capital Medical University, 8 Gongti Nanlu, Chao-Yang District, Beijing 100020, China.  
E-mail: shihuanzhong@sina.com

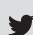

@ERSpublications

These data showed that age  $\geq 65$  years, pre-existing concurrent cardiovascular or cerebrovascular diseases,  $CD3^+CD8^+$  T-cells  $\leq 75$  cells- $\mu L^{-1}$  and cardiac troponin I  $\geq 0.05$  ng-mL<sup>-1</sup> were four risk factors predicting high mortality of COVID-19 pneumonia patients <https://bit.ly/2Rh6Nqv>

**Cite this article as:** Du R-H, Liang L-R, Yang C-Q, *et al.* Predictors of mortality for patients with COVID-19 pneumonia caused by SARS-CoV-2: a prospective cohort study. *Eur Respir J* 2020; 55: 2000524 [<https://doi.org/10.1183/13993003.00524-2020>].

This single-page version can be shared freely online.

**ABSTRACT** The aim of this study was to identify factors associated with the death of patients with COVID-19 pneumonia caused by the novel coronavirus SARS-CoV-2.

All clinical and laboratory parameters were collected prospectively from a cohort of patients with COVID-19 pneumonia who were hospitalised to Wuhan Pulmonary Hospital (Wuhan City, Hubei Province, China) between 25 December 2019 and 7 February 2020. Univariate and multivariate logistic regression was performed to investigate the relationship between each variable and the risk of death of COVID-19 pneumonia patients.

In total, 179 patients with COVID-19 pneumonia (97 male and 82 female) were included in the present prospective study, of whom 21 died. Univariate and multivariate logistic regression analysis revealed that age  $\geq 65$  years (OR 3.765, 95% CI 1.146–17.394;  $p=0.023$ ), pre-existing concurrent cardiovascular or cerebrovascular diseases (OR 2.464, 95% CI 0.755–8.044;  $p=0.007$ ),  $CD3^+CD8^+$  T-cells  $\leq 75$  cells- $\mu L^{-1}$  (OR 3.982, 95% CI 1.132–14.006;  $p<0.001$ ) and cardiac troponin I  $\geq 0.05$  ng-mL<sup>-1</sup> (OR 4.077, 95% CI 1.166–14.253;  $p<0.001$ ) were associated with an increase in risk of mortality from COVID-19 pneumonia. In a sex-, age- and comorbid illness-matched case-control study,  $CD3^+CD8^+$  T-cells  $\leq 75$  cells- $\mu L^{-1}$  and cardiac troponin I  $\geq 0.05$  ng-mL<sup>-1</sup> remained as predictors for high mortality from COVID-19 pneumonia.

We identified four risk factors: age  $\geq 65$  years, pre-existing concurrent cardiovascular or cerebrovascular diseases,  $CD3^+CD8^+$  T-cells  $\leq 75$  cells- $\mu L^{-1}$  and cardiac troponin I  $\geq 0.05$  ng-mL<sup>-1</sup>. The latter two factors, especially, were predictors for mortality of COVID-19 pneumonia patients.
