# Supplementary material for: Predictors of mortality for patients with COVID-19 pneumonia caused by SARS-CoV-2: a prospective cohort study
Source: PubMed Central journal article supplement — Eur Respir J. 2020 May 7;55(5):2000524. doi: 10.1183/13993003.00524-2020 (PMC7144257; doi:10.1183/13993003.00524-2020), 2020-05-07
Supplement: ERJ-00524-2020.SUPPLEMENT.pdf [file ERJ-00524-2020.SUPPLEMENT.pdf]

Supplementary Table S1. Characteristics of 21 Patients Who Died from COVID-19 Pneumonia.

| Patient No. | Sex    | Age (years) | Underlying disease                                                                                                                                        | Treatment                                                                                                | SOFA score | Admission date | Death date |
|-------------|--------|-------------|-----------------------------------------------------------------------------------------------------------------------------------------------------------|----------------------------------------------------------------------------------------------------------|------------|----------------|------------|
| 1           | Male   | 82          | Hypertension, cardiovascular or cerebrovascular diseases                                                                                                  | Oxygen therapy, antibiotics, antiviral drug, glucocorticoids, $\gamma$ -globulin, mechanical ventilation | 14         | Jan 24         | Jan 26     |
| 2           | Male   | 71          | Hypertension, cardiovascular or cerebrovascular diseases, diabetes                                                                                        | Oxygen therapy, antibiotics, antiviral drug, glucocorticoids, $\gamma$ -globulin, mechanical ventilation | 3          | Jan 15         | Jan 26     |
| 3           | Female | 66          | Hypertension                                                                                                                                              | Oxygen therapy, antibiotics, antiviral drug, glucocorticoids, $\gamma$ -globulin, mechanical ventilation | 3          | Jan 9          | Jan 28     |
| 4           | Male   | 72          | Hypertension, cardiovascular or cerebrovascular diseases, diabetes                                                                                        | Oxygen therapy, antibiotics, antiviral drug, glucocorticoids, $\gamma$ -globulin, mechanical ventilation | 8          | Jan 7          | Jan 28     |
| 5           | Male   | 77          | Prostatitis                                                                                                                                               | Oxygen therapy, antibiotics, antiviral drug, glucocorticoids, mechanical ventilation                     | 2          | Jan 23         | Jan 29     |
| 6           | Female | 51          | Hyperlipidemia                                                                                                                                            | Oxygen therapy, antibiotics, antiviral drug, glucocorticoids, $\gamma$ -globulin, mechanical ventilation | 3          | Jan 26         | Jan 30     |
| 7           | Female | 79          | Hypertension, cardiovascular or cerebrovascular diseases, diabetes, chronic digestive disorders, peripheral vascular disease, chronic renal insufficiency | Oxygen therapy, antibiotics, glucocorticoids, mechanical ventilation                                     | 7          | Jan 20         | Jan 26     |

|    |        |    |                                                                                                                                |                                                                                                                |   |        |        |
|----|--------|----|--------------------------------------------------------------------------------------------------------------------------------|----------------------------------------------------------------------------------------------------------------|---|--------|--------|
| 8  | Male   | 80 | Hypertension, cardiovascular or cerebrovascular diseases, diabetes                                                             | Oxygen therapy, antibiotics, antiviral drug, mechanical ventilation                                            | 4 | Jan 22 | Jan 27 |
| 9  | Female | 62 | Cardiovascular or cerebrovascular diseases, chronic digestive disorders                                                        | Oxygen therapy, antibiotics, antiviral drug, glucocorticoids, $\gamma$ -globulin, mechanical ventilation, ECMO | 3 | Jan 6  | Feb 7  |
| 10 | Female | 68 | No                                                                                                                             | Oxygen therapy, antibiotics, antiviral drug, glucocorticoids, $\gamma$ -globulin, mechanical ventilation, ECMO | 3 | Jan 12 | Feb 1  |
| 11 | Male   | 69 | Hypertension, cardiovascular or cerebrovascular diseases, diabetes                                                             | Oxygen therapy, antibiotics, antiviral drug, glucocorticoids, $\gamma$ -globulin, mechanical ventilation       | 6 | Jan 20 | Feb 3  |
| 12 | Female | 71 | Hypertension, cardiovascular or cerebrovascular diseases, peripheral vascular disease, chronic renal insufficiency, malignancy | Oxygen therapy, antibiotics, antiviral drug, glucocorticoids, $\gamma$ -globulin, mechanical ventilation       | 5 | Feb 3  | Feb 7  |
| 13 | Male   | 77 | Hypertension, benign prostatic hyperplasia                                                                                     | Oxygen therapy, antibiotics, antiviral drug, glucocorticoids, $\gamma$ -globulin, mechanical ventilation       | 4 | Jan 28 | Feb 6  |
| 14 | Female | 66 | Rheumatoid arthritis                                                                                                           | Oxygen therapy, antibiotics, antiviral drug, $\gamma$ -globulin, mechanical ventilation                        | – | Jan 25 | Feb 3  |
| 15 | Female | 62 | No                                                                                                                             | Oxygen therapy, antibiotics, antiviral drug, $\gamma$ -globulin, mechanical ventilation                        | – | Jan 24 | Feb 2  |
| 16 | Male   | 68 | Cardiovascular or                                                                                                              | Oxygen therapy, antibiotics, antiviral                                                                         | 3 | Jan 11 | Feb 1  |

|    |        |    |                                                                                                 |                                                                                                          |   |        |        |
|----|--------|----|-------------------------------------------------------------------------------------------------|----------------------------------------------------------------------------------------------------------|---|--------|--------|
|    |        |    | cerebrovascular diseases                                                                        | drug, glucocorticoids, $\gamma$ -globulin, mechanical ventilation                                        |   |        |        |
| 17 | Male   | 72 | Hypertension                                                                                    | Oxygen therapy, antibiotics, antiviral drug, glucocorticoids, $\gamma$ -globulin, mechanical ventilation | 5 | Jan 28 | Feb 7  |
| 18 | Female | 60 | No                                                                                              | Oxygen therapy, antibiotics, antiviral drug, glucocorticoids, $\gamma$ -globulin, mechanical ventilation | 3 | Jan 10 | Feb 9  |
| 19 | Female | 69 | Hypertension, cardiovascular or cerebrovascular diseases, chronic digestive disorders           | Oxygen therapy, antibiotics, antiviral drug, glucocorticoids, $\gamma$ -globulin, mechanical ventilation | 3 | Jan 26 | Feb 8  |
| 20 | Female | 71 | Hypertension, cardiovascular or cerebrovascular diseases                                        | Oxygen therapy, antibiotics, antiviral drug, glucocorticoids, $\gamma$ -globulin, mechanical ventilation | 3 | Jan 30 | Feb 10 |
| 21 | Male   | 81 | Hypertension, cardiovascular or cerebrovascular diseases, diabetes, chronic digestive disorders | Oxygen therapy, antibiotics, antiviral drug, glucocorticoids, $\gamma$ -globulin, mechanical ventilation | 3 | Jan 30 | Feb 10 |

ECMO, extracorporeal membrane oxygenation. SOFA score, sequential organ failure assessment include oxygenation index, platelet count, cardiovascular system drug dose, glasgow coma score and creatinine.

Supplementary Table S2. Comparison of Demography and Clinical Presentation between Deceased and Gender-, Age-, and Underlying disease-Matched Case-Control Survivors\*.

| Characteristic                             | Total<br>(n = 63) | Deceased<br>(n = 21) | Survivors<br>(n = 42) | <i>P</i> value |
|--------------------------------------------|-------------------|----------------------|-----------------------|----------------|
| Age, years                                 | 69.7±7.7          | 70.2±7.7             | 69.5±7.8              | 0.741          |
| Sex, n (%)                                 |                   |                      |                       | 1.000          |
| Male                                       | 30 (47.6)         | 10 (47.6)            | 20 (47.6)             |                |
| Female                                     | 33 (52.4)         | 11 (52.4)            | 22 (52.4)             |                |
| Underlying diseases, n (%)                 |                   |                      |                       |                |
| Hypertension                               | 36 (57.1)         | 13 (61.9)            | 23 (54.8)             | 0.788          |
| Cardiovascular or cerebrovascular diseases | 25 (39.7)         | 12 (57.1)            | 13 (31.0)             | 0.059          |
| Diabetes                                   | 20 (31.7)         | 6 (28.6)             | 14 (33.3)             | 0.780          |
| Chronic digestive disorders                | 8 (12.7)          | 4 (19.0)             | 4 (9.5)               | 0.423          |
| Tuberculosis                               | 3 (4.8)           | 0 (0)                | 3 (7.1)               | 0.545          |
| Peripheral vascular disease                | 4 (6.3)           | 2 (9.5)              | 2 (4.8)               | 0.595          |
| Chronic hepatic or renal insufficiency     | 2 (3.2)           | 2 (9.5)              | 0 (0)                 | 0.108          |
| Malignancy                                 | 2 (3.2)           | 1 (4.8)              | 1 (2.4)               | 1.000          |
| Symptom, n (%)                             |                   |                      |                       |                |
| Fever                                      | 63 (100)          | 21 (100)             | 42 (100)              | –              |
| Dry Cough                                  | 51 (81.0)         | 14 (66.7)            | 37 (88.1)             | 0.085          |
| Dyspnea                                    | 45 (71.4)         | 18 (85.7)            | 27 (64.3)             | 0.137          |
| Fatigue                                    | 42 (66.7)         | 13 (61.9)            | 29 (69.0)             | 0.584          |
| Sputum production                          | 31 (49.2)         | 12 (57.1)            | 19 (45.2)             | 0.430          |
| Gastrointestinal symptoms                  | 24 (38.1)         | 8 (38.1)             | 16 (38.1)             | 1.000          |
| Myalgia                                    | 21 (33.3)         | 7 (33.3)             | 14 (33.3)             | 1.000          |
| Headache                                   | 12 (19.0)         | 5 (23.8)             | 7 (16.7)              | 0.513          |

|                                |                       |                      |                     |       |
|--------------------------------|-----------------------|----------------------|---------------------|-------|
| Hemoptysis                     | 3 (4.8)               | 0 (0)                | 3 (7.1)             | 0.545 |
| Systolic blood pressure, mmHg  | –                     | Not available        | 121±21              |       |
| Diastolic blood pressure, mmHg | –                     | Not available        | 76±11               |       |
| Temperature, °C, n (%)         |                       |                      |                     | 0.053 |
| < 37.3                         | 40 (63.5)             | 16 (76.2)            | 24 (57.1)           |       |
| ≥ 37.3                         | 23 (36.5)             | 5 (23.8)             | 18 (42.9)           |       |
| Respiratory rate, breath/min   | 21.0 (20.0–<br>30.0)  | 20.0(20.0–<br>34.5)  | 21.0(20.0–<br>26.3) | 0.534 |
| Heart rate, beat/min           | 88.0 (76.5–<br>102.5) | 94.0(78.0–<br>109.5) | 86.5(72.5–<br>98.0) | 0.083 |

\*Data are reported as Mean±SD, median interquartile (IQR), or n (%) as appropriate.

Supplementary Table S3. Comparison of Laboratory Findings between Deceased and Age-Gender Matched Case-Control Survivors \*.

| Characteristic                                     | Total<br>(n = 63)        | Deceased<br>(n = 21)     | Survivors<br>(n = 42)    | <i>P</i> value |
|----------------------------------------------------|--------------------------|--------------------------|--------------------------|----------------|
| White blood cell counts, × 10 <sup>9</sup> /L      | 6.6 (4.1–9.7)            | 8.9 (4.8–13.1)           | 5.8 (3.8–8.8)            | 0.052          |
| Neutrophils, × 10 <sup>9</sup> /L                  | 5.6 (2.9–8.3)            | 7.7 (3.0–11.5)           | 4.8 (2.8–7.4)            | 0.085          |
| Lymphocytes, × 10 <sup>9</sup> /L                  | 0.7 (0.5–0.9)            | 0.7 (0.5–0.8)            | 0.6 (0.5–1.0)            | 0.873          |
| T cell subsets                                     |                          |                          |                          |                |
| CD3 <sup>+</sup> CD4 <sup>+</sup> T cells, cell/μL | 92.6 (62.8–<br>185.6)    | 68.0 (55.1–<br>148.8)    | 114.6 (75.0–<br>195.2)   | 0.068          |
| CD3 <sup>+</sup> CD8 <sup>+</sup> T cells, cell/μL | 70.1 (33.3–<br>113.6)    | 47.9 (25.4–<br>73.8)     | 97.2 (55.4–<br>132.1)    | 0.005          |
| C-reactive protein, mg/L                           | 65.8 (27.8–<br>101.4)    | 86.4 (37.9–<br>105.5)    | 58.1 (26.3–<br>95.2)     | 0.124          |
| Procalcitonin, ng/mL                               | 0.1 (0.0–0.3)            | 0.1 (0.1–0.5)            | 0.1 (0.0–0.2)            | 0.032          |
| Cardiac troponin I, ng/mL                          | 0.0 (0.0–0.1)            | 0.1 (0.0–0.8)            | 0.0 (0.0–0.1)            | 0.001          |
| Myoglobin, ng/mL                                   | 60.3 (34.3–<br>190.5)    | 162.0 (48.5–<br>342.8)   | 47.5 (28.0–<br>142.0)    | 0.027          |
| Brain natriuretic peptide, pg/mL                   | 946.5 (444.0–<br>1700.0) | 970.0 (620.5–<br>3531.0) | 882.0 (399.5–<br>1393.0) | 0.212          |
| Albumin, g/L                                       | 33.0 (30.6–<br>35.7)     | 33.2 (31.2–<br>35.6)     | 31.6 (30.0–<br>36.1)     | 0.473          |
| Total bilirubin, μmol/L                            | 9.6 (8.2–15.4)           | 9.6 (8.3–16.3)           | 9.4 (8.1–15.5)           | 0.729          |
| Direct bilirubin, μmol/L                           | 3.4 (2.2–6.1)            | 3.1 (2.3–6.1)            | 3.6 (2.2–6.1)            | 0.808          |
| Alanine aminotransferase, U/L                      | 29.0 (20.0–<br>43.0)     | 27.0 (20.0–<br>37.0)     | 31.0 (18.5–<br>44.8)     | 0.855          |
| Aspartate aminotransferase, U/L                    | 40.0 (24.0–<br>57.0)     | 40.0 (27.0–<br>61.5)     | 39.5 (20.8–<br>52.5)     | 0.362          |

|                                                            |                       |                       |                         |       |
|------------------------------------------------------------|-----------------------|-----------------------|-------------------------|-------|
| $\gamma$ -Glutamyltranspeptidase, U/L                      | 30.0 (19.0–<br>43.0)  | 23.0 (16.5–<br>42.0)  | 32.0 (19.8–<br>54.0)    | 0.290 |
| Creatinine, $\mu$ mol/L                                    | 64.0 (56.0–<br>87.0)  | 95.0 (63.0–<br>112.0) | 60.0 (54.8–<br>74.3)    | 0.001 |
| D-dimer, mg/L                                              | 0.6 (0.4–2.9)         | 1.1 (0.4–10.5)        | 0.6 (0.4–1.2)           | 0.075 |
| Prothrombin time, s                                        | 13.3 (12.3–<br>15.3)  | 13.9 (12.3–<br>16.3)  | 13.2 (12.3–<br>14.5)    | 0.420 |
| Activated partial thromboplastin time, s                   | 35.0 (32.1–<br>39.7)  | 37.8 (30.8–<br>41.5)  | 34.6 (32.4–<br>39.0)    | 0.385 |
| PaO <sub>2</sub> , mmHg                                    | 59.0 (49.0 –<br>74.0) | 56.0 (49.0 –<br>71.0) | 64.5 (49.0–<br>80.5)    | 0.358 |
| PaCO <sub>2</sub> , mmHg                                   | 36.0 (31.5–<br>41.0)  | 34.0 (29.0–<br>41.0)  | 36.5 (33.0–<br>41.0)    | 0.169 |
| PaO <sub>2</sub> :F <sub>I</sub> O <sub>2</sub> < 200 mmHg | 47.6                  | 29.2                  | 2.204 (0.854–<br>5.684) | 0.102 |

\*Data are reported as median interquartile (IQR).

PaO<sub>2</sub> = Arterial partial pressure of oxygen, PaCO<sub>2</sub> = Arterial partial pressure of carbon dioxide, F<sub>I</sub>O<sub>2</sub> = fraction of inspiration O<sub>2</sub>.
